# Supplementary material for: Impact of feedback and monitoring on colonoscopy withdrawal times and polyp detection rates
Source: PubMed Central journal article supplement — BMJ Open Gastroenterol. 2017 Jun 1;4(1):e000142. doi: 10.1136/bmjgast-2017-000142 (PMC5508965; doi:10.1136/bmjgast-2017-000142), 2017-06-01
Supplement: bmjgast-2017-000142supp.pdf [file bmjgast-2017-000142supp.pdf]

## Quality of Endoscopy Survey (form to be completed by assistant nurse)

---

Date of examination: DD-MM-YYYY

Civil registration number (patient)/admission number: XXXXXX-XXXX

### Colonoscopy details (actual clock; h:min)

Procedure start XX:XX

Cecum reached at XX:XX

Procedure completed XX:XX

### Any breaks for polypectomy

From XX:XX to XX:XX

From XX:XX to XX:XX

From XX:XX to XX:XX

From XX:XX to XX:XX

### Polyps Detected? (choose one)

Yes

No

|  |  |
|--|--|
|  |  |
|--|--|

*Thank you for filling out the form.*

*Please return to: Dr. Jakob Hendel*
